# Supplementary material
Source: publisher figshare collection journal article supplement (https://acs.figshare.com/ndownloader/files/4007566)
Supplement: Supplementary file 1 [file 4007566]

**Control of mode/bond selectivity and product energy disposal by the transition state: The X  
+ H<sub>2</sub>O (X=H, F, O(<sup>3</sup>P), and Cl) reactions**

Bin Jiang and Hua Guo<sup>\*</sup>

*Department of Chemistry and Chemical Biology, University of New Mexico, Albuquerque, New  
Mexico 87131*

**Supporting Information**

## S-I. Quantum Scattering Theory

The integral cross sections (ICS) for the atom-triatom reactions are calculated using the Chebyshev real wave packet (CRWP) method.<sup>1-2</sup> The CRWP method for atom-diatom reactions has been discussed in detail elsewhere,<sup>3-5</sup> we therefore focus here on its application to atom-triatom reactions. The six-dimensional Hamiltonian ( $\hbar = 1$ ) can be written in the ABC+D Jacobi coordinates (see Fig. S-1):

$$\hat{H} = -\frac{1}{2\mu_1} \frac{\partial^2}{\partial r_1^2} - \frac{1}{2\mu_2} \frac{\partial^2}{\partial r_2^2} - \frac{1}{2\mu_3} \frac{\partial^2}{\partial r_3^2} + \frac{\hat{j}_1^2}{2\mu_1 r_1^2} + \frac{(\hat{j}_{12} - \hat{j}_1)^2}{2\mu_2 r_2^2} + \frac{(\hat{J} - \hat{j}_{12})^2}{2\mu_3 r_3^2} + V(r_1, r_2, r_3, \theta_1, \theta_2, \varphi), \quad (1)$$

where the  $r_1$  is the bond length of AB bond,  $r_2$  the distance between the centre of mass of AB and C, and  $r_3$  the distance between D and the centre of mass of triatomic molecule ABC.  $\mu_i$  ( $i=1, 2, 3$ ) are the corresponding reduced masses,  $\hat{j}_1$ ,  $\hat{j}_{12}$ , and  $\hat{J}$  are the angular momentum operators for AB, ABC and total system, respectively.

We choose to work in the body-fixed (BF) frame in which the  $z'$  axis lies along the  $r_3$  vector and  $r_2$  is in the  $x'z'$  plane. The BF frame is related to the space-fixed (SF) frame ( $xyz$ ) *via* a rotation defined by three Euler angles. The projection of the total angular momentum  $J$  onto the SF or BF frame is given by  $M$  or  $K$ . For convenience, we define a molecular-fixed (MF) frame in which the  $z''$  axis lies along  $r_2$  vector and  $r_1$  is in the  $x''z''$  plane. Note that the BF and MF frames for atom-triatom system (ABC+D) are equivalent to the SF and BF frames respectively for the atom-diatom subsystem (ABC). As a result, the projection of the  $j_{12}$  onto the BF or MF frame is given by  $K$  or  $m$ , and  $m$  is also the projection of  $j_1$  onto the MF frame.

The overall rotational basis used in this work is the so-called primitive or uncoupled angular basis,<sup>6-7</sup> which has the following parity-adapted form:

$$\begin{aligned} |j_{12}j_1Km : JMp\rangle = & \sqrt{\frac{1}{2(1+\delta_{K0}\delta_{m0})}} \\ & \times \left[ |JMK\rangle |j_{12}j_1Km\rangle + p(-1)^J |JM-K\rangle |j_{12}j_1-K-m\rangle \right], \end{aligned} \quad (2)$$

where  $p = \pm 1$  is the parity,  $|JMK\rangle$  is the normalized Wigner rotational matrix defined in terms of the Euler angles,<sup>8</sup>

$$|JMK\rangle = \sqrt{\frac{2J+1}{8\pi^2}} D_{MK}^{J*}(\alpha, \beta, 0), \quad (3)$$

and  $|j_{12}j_1Km\rangle$  is, on the other hand, the angular basis of ABC in the MF frame (namely the BF frame for ABC itself),<sup>9</sup>

$$|j_{12}j_1Km\rangle = D_{Km}^{j_{12}}(0, \theta_2, \varphi) y_{j_1m}(\theta_1, 0) = d_{Km}^{j_{12}}(\theta_2) e^{im\varphi} y_{j_1m}(\theta_1, 0), \quad (4)$$

where  $d_{Km}^{j_{12}}(\theta_2)$ ,  $e^{im\varphi}$ , and  $y_{j_1m}(\theta_1, 0)$  represent the reduced Wigner matrix, exponential Fourier function, and the spherical harmonic function, respectively.

This uncoupled angular basis  $|j_{12}j_1Km : JMp\rangle$  is different from the coupled angular basis  $|j_{12}j_1Kl_2 : JMp\rangle$  used by other authors,<sup>10</sup> who have adapted a triatomic angular basis  $|j_{12}j_1Kl_2\rangle$  in the BF frame (namely the SF frame for ABC), where  $l_2$  is the orbital momentum of AB with respect to C. However, the uncoupled basis is related with the coupled one through a transformation,<sup>9</sup>

$$\begin{aligned}
& |j_{12}j_1Kl_2 : JMp\rangle \\
&= \sqrt{\frac{1}{2(1+\delta_{K0})}} \times \left[ |JMK\rangle |j_{12}j_1Kl_2\rangle + p(-1)^{J+j_{12}+j_1+l_2} |JM-K\rangle |j_{12}j_1-Kl_2\rangle \right] \\
&= \sum_m \sqrt{\frac{(1+\delta_{K0}\delta_{m0})}{(1+\delta_{K0})}} C_{j_2m} |j_{12}j_1Km : JMp\rangle,
\end{aligned} \tag{5}$$

where  $C_{l_2m} = \sqrt{(2l_2+1)/(2j_{12}+1)} \langle j_1ml_20 | j_{12}m \rangle$  is the Clebsch–Gordan coefficient.<sup>8</sup> Similar to the diatom-diatom system,<sup>6</sup> the uncoupled basis is advantageous for transformation back and forth between a grid and basis representation when computing the action of the potential energy operator. We refer the readers to earlier publications<sup>6-7,10-11</sup> for more details.

The action of angular kinetic energy operators (KEOs) on this rotational basis give rise to a diagonal or tridiagonal form,

$$\frac{\hat{j}_1^2}{2\mu_{r_1}r_1^2} |j_{12}j_1Km : JMp\rangle = \frac{j_1 \times (j_1+1)}{2\mu_{r_1}r_1^2} |j_{12}j_1Km : JMp\rangle, \tag{6}$$

$$\begin{aligned}
& \frac{(\hat{j}_{12} - \hat{j}_1)^2}{2\mu_1r_2^2} |j_{12}j_1Km : JMp\rangle \\
&= \frac{j_{12} \times (j_{12}+1) + j_1 \times (j_1+1) - 2m^2}{2\mu_1r_2^2} |j_{12}j_1Km : JMp\rangle \\
&- \frac{\lambda_{j_{12}m}^+ \lambda_{j_1m}^+ \sqrt{1+\delta_{K0}\delta_{m0}} |j_{12}j_1K, m+1 : JMp\rangle + \lambda_{j_{12}m}^- \lambda_{j_1m}^- \sqrt{1+\delta_{K0}\delta_{m1}} |j_{12}j_1K, m-1 : JMp\rangle}{2\mu_1r_2^2},
\end{aligned} \tag{7}$$

$$\begin{aligned}
& \frac{(\hat{J} - \hat{j}_{12})^2}{2\mu_3r_3^2} |j_{12}j_1Km : JMp\rangle \\
&= \frac{J(J+1) + j_{12}(j_{12}+1) - 2K^2}{2\mu_3r_3^2} |j_{12}j_1Km : JMp\rangle \\
&- \frac{\lambda_{JK}^+ \lambda_{j_{12}K}^+ \sqrt{1+\delta_{K0}\delta_{m0}} |j_{12}j_1K+1, m : JMp\rangle + \lambda_{JK}^- \lambda_{j_{12}K}^- \sqrt{1+\delta_{K1}\delta_{m0}} |j_{12}j_1K-1, m : JMp\rangle}{2\mu_3r_3^2},
\end{aligned} \tag{8}$$

where the quantity  $\lambda_{ab}^{\pm} = \sqrt{a(a+1) - b(b \pm 1)}$ .

The action of the potential energy operator is evaluated in the discrete variable representation (DVR), which is a direct product of the Gauss-Legendre quadrature points in  $\theta_1$  and  $\theta_2$ , and a Fourier grid in  $\varphi$ .<sup>12-13</sup> The transformation matrix between the angular basis and the DVR is consist of three one-dimensional pseudo-spectral transformations,<sup>14</sup>

$$U_{j_1 i_1}^m = \sqrt{\omega_{i_1}} y_{j_1 m}(\theta_{i_1}, 0), \quad (9)$$

$$U_{j_1 i_2}^{Km} = \sqrt{\omega_{i_2}} d_{Km}^{j_1}(\theta_{i_2}), \quad (10)$$

$$U_{m i_3} = \sqrt{\omega_{i_3}} e^{im\varphi_{i_3}}, \quad (11)$$

where  $\omega_{i_1}$ ,  $\omega_{i_2}$  and  $\omega_{i_3}$  are corresponding quadrature weights and  $\theta_{i_1}$ ,  $\theta_{i_2}$  and  $\varphi_{i_3}$  are corresponding quadrature roots. In particular, taking advantage of the inversion symmetry of the potential, only a sine (cosine) function only for odd (even) parity is needed when  $K$  equals 0.<sup>12</sup> While for  $K > 0$ , which is indeed required in the exact close-coupling (CC) calculation, Eq. (11) can be expanded as both sine and cosine functions, resulting in two separate blocks in the vector-matrix multiplication and both contributing to one calculation of a specific parity.<sup>7</sup> This allows us to perform the wavepacket propagation in a real domain, so that significant memory savings can be achieved comparing to a complex wavepacket propagation. On the other hand, sine-DVR<sup>15</sup> was used for the two reactive radial degrees of freedom  $r_3$  and  $r_2$  typically and potential optimized DVR (PODVR)<sup>16</sup> was used for  $r_1$  while it is non-reactive. For reactions that both channels are open, sine-DVR was used for all radial coordinates.

The initial wave packet  $|\Psi_i\rangle$  was defined in the space-fixed (SF) representation with a direct product of the ro-vibrational eigenfunction  $|\psi_{v_i, j_{12i}}\rangle$  of the triatom and a Gaussian wave packet in the scattering coordinate:<sup>4</sup>

$$|\Psi_i\rangle = N e^{-(R-R_0)^2/2\delta^2} \cos k_0 R |\psi_{v_i, j_{12i}}\rangle |j_{12i} l_{12i}, Jp\rangle, \quad (12)$$

where  $N$  is the normalization factor,  $R_0$  and  $\delta$  the mean position and width of the Gaussian function,  $j_{12i}$  and  $l_{12i}$  are the initial total angular momentum of ABC and the initial orbital angular momentum of ABC with respect to D,  $l_{12i}$  is determined by  $|J - j_{12i}| \leq l_{12i} \leq |J + j_{12i}|$ . The mean momentum  $k_0$  is related to the mean kinetic energy  $E_0$  via  $k_0 = \sqrt{2\mu_R E_0}$ . This SF initial wave function was converted to the BF frame before propagation.

The wave packet propagation was implemented using the modified three-term Chebyshev iteration,<sup>17-19</sup>

$$|\Psi_k\rangle = 2D\hat{H}_s |\Psi_{k-1}\rangle - D^2 |\Psi_{k-2}\rangle, \quad k \geq 2, \quad (13)$$

where  $|\Psi_1\rangle = D\hat{H}_s |\Psi_0\rangle$  and  $|\Psi_0\rangle = |\Psi_i\rangle$ .  $D$  is a damping function defined in the edges of the grid to impose outgoing boundary conditions,<sup>17</sup>

$$D(\zeta) = \begin{cases} 1 & \zeta < \zeta_d, \\ e^{-\alpha \left( \frac{\zeta - \zeta_d}{\zeta_{\max} - \zeta_d} \right)^2} & \zeta \geq \zeta_d, \end{cases} \quad (14)$$

where  $\zeta = r_3, r_2$ , or  $r_1$ . The scaled Hamiltonian is defined as:

$$\hat{H}_s = (\hat{H} - \bar{H}) / \Delta H, \quad (15)$$

to avoid the divergence of the Chebyshev propagator outside the range  $[-1, 1]$ . Here, the mean and half-width of the Hamiltonian are determined as  $\bar{H} = (H_{\max} + H_{\min})/2$  and  $\Delta H = (H_{\max} - H_{\min})/2$ , where  $H_{\max}$  and  $H_{\min}$  define the spectral range of the Hamiltonian and can be estimated from the kinetic and potential energies on the grid.

The initial state-selected reaction probability was obtained directly by analyzing the flux through the dividing surface in the product channel ( $r = r_f$ ),<sup>3</sup>

$$P_{v_i, j_{12i}, l_{12i}}^J(E_c) = \frac{1}{2\pi\mu_r |a_i(E_c)|^2 \Delta H^2 (1 - E_s^2)} \times \text{Im} \left[ \left\langle \sum_{k=0} (2 - \delta_{k0}) e^{-ik \arccos E_s} \Psi_k \right| \times \delta(r - r_f) \frac{\partial}{\partial r} \left| \sum_{k'=0} (2 - \delta_{k'0}) e^{-ik' \arccos E_s} \Psi_{k'} \right| \right]_{r=r_f}, \quad (16)$$

where  $E_c$  is the collision energy,  $E_s$  the scaled energy ( $E_s = (E - \bar{H})/\Delta H$ ),  $a_i(E_c)$  the energy amplitude of the initial wave packet, and the dividing surface could be set up in either  $r_1$  or  $r_2$ .

The initial state-specified integral cross section (ICS) can then be obtained by summing initial state-specified reaction probabilities ( $P_{v_i, j_{12i}, l_{12i}}^J(E_c)$ ) over all contributing partial waves

$$\sigma_{v_i, j_{12i}}(E_c) = \frac{1}{2j_{12i} + 1} \sum_{l_{12i}} \left\{ \frac{\pi}{2\mu_{r_3} E_c} \sum_J (2J + 1) P_{v_i, j_{12i}, l_{12i}}^J(E_c) \right\}. \quad (17)$$

Both the CC and centrifugal sudden (CS)<sup>20-21</sup> calculations have been performed. To verify our method, calculations for the  $\text{H} + \text{H}_2\text{O}$  reaction have been performed for several  $J$  values at both CC and CS levels and the results compare well with the earlier results of Zhang et al.<sup>22</sup> In Fig. S-2, the comparison between CC and CS results are presented for both the  $\text{F} + \text{H}_2\text{O}$  and  $\text{O} + \text{H}_2\text{O}$  reactions. The numerical parameters used in our CRWP calculations are given in Table S-I.

Table S-I. Numerical parameters used in calculations on three PESs. (Atomic units are used unless stated otherwise.)

| Parameters                  | H+H <sub>2</sub> O <sup>a</sup>                                             | F+H <sub>2</sub> O                                                                                            | O+H <sub>2</sub> O                                                                                            |
|-----------------------------|-----------------------------------------------------------------------------|---------------------------------------------------------------------------------------------------------------|---------------------------------------------------------------------------------------------------------------|
| Grid/basis ranges and sizes | $r_3 \in [1.4, 14.0]$                                                       | $r_3 \in [2.0, 18.0]$                                                                                         | $r_3 \in [2.0, 14.0]$                                                                                         |
|                             | $N_{r_3}^{\text{tot}} = 72, N_{r_3}^{\text{int}} = 25$                      | $N_{r_3}^{\text{tot}} = 220, N_{r_3}^{\text{int}} = 58$                                                       | $N_{r_3}^{\text{tot}} = 220, N_{r_3}^{\text{int}} = 60$                                                       |
|                             | $r_2 \in [1.0, 5.0]$                                                        | $r_2 \in [1.0, 5.0]$                                                                                          | $r_2 \in [1.0, 5.0]$                                                                                          |
|                             | $N_{r_2}^{\text{tot}} = 28, N_{r_2}^{\text{int}} = 8$                       | $N_{r_2}^{\text{tot}} = 25, N_{r_2}^{\text{int}} = 7$                                                         | $N_{r_2}^{\text{tot}} = 25, N_{r_2}^{\text{int}} = 5$                                                         |
|                             | $r_1 = 1.865$<br>$(N_{\theta 1}, N_{\theta 2}, N_{\varphi}) = (15, 30, 15)$ | $r_1 \in [1.2, 5.0],$<br>$N_{\text{PODVR}} = 7$<br>$(N_{\theta 1}, N_{\theta 2}, N_{\varphi}) = (18, 38, 18)$ | $r_1 \in [1.0, 4.0],$<br>$N_{\text{PODVR}} = 4$<br>$(N_{\theta 1}, N_{\theta 2}, N_{\varphi}) = (18, 35, 18)$ |
| Absorbing potential         | For $r_3$ :                                                                 | For $r_3$ :                                                                                                   | For $r_3$ :                                                                                                   |
|                             | $\zeta_d = 10.5, \alpha = 0.1$                                              | $\zeta_d = 16.0, \alpha = 0.1$                                                                                | $\zeta_d = 12.0, \alpha = 0.1$                                                                                |
|                             | For $r_2$ :                                                                 | For $r_2$ :                                                                                                   | For $r_2$ :                                                                                                   |
|                             | $\zeta_d = 3.2, \alpha = 0.1$                                               | $\zeta_d = 3.2, \alpha = 0.1$                                                                                 | $\zeta_d = 3.0, \alpha = 0.1$                                                                                 |
| Initial wavepacket          |                                                                             | For $r_1$ :                                                                                                   |                                                                                                               |
|                             |                                                                             | $\zeta_d = 2.4, \alpha = 0.1$                                                                                 |                                                                                                               |
| Flux position               | $R_0 = 10.0, \delta = 0.40$                                                 | $R_0 = 15.8, \delta = 0.15$                                                                                   | $R_0 = 11.5, \delta = 0.10$                                                                                   |
|                             | $E_0 = 1.00 \text{ eV}$                                                     | $E_0 = 0.25 \text{ eV}$                                                                                       | $E_0 = 1.00 \text{ eV}$                                                                                       |
| Converged $J_{\text{max}}$  | $r_{2\text{flux}} = 2.9$                                                    | $r_{2\text{flux}} = 3.1$                                                                                      | $r_{2\text{flux}} = 2.8$                                                                                      |
| Propagation step            | 1000                                                                        | 7000                                                                                                          | 2000                                                                                                          |

<sup>a</sup>: Parameters used for comparison with Ref. 22



Fig. S-1. The atom-triatom Jacobi coordinates used in the quantum scattering calculations.

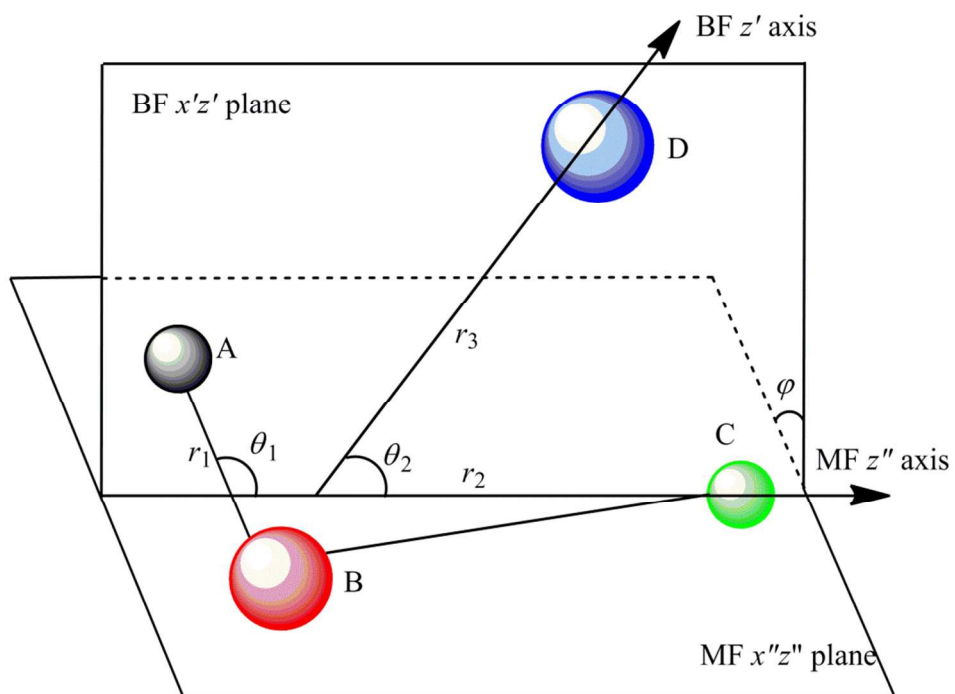

Fig. S-2 Top panel: Comparison of the CC and CS ICSs for the  $F + H_2O(000)$  reaction. Lower panel: Comparison of the CC and CS reaction probabilities for the  $O + H_2O(000)$  reactions at several  $J$  values.

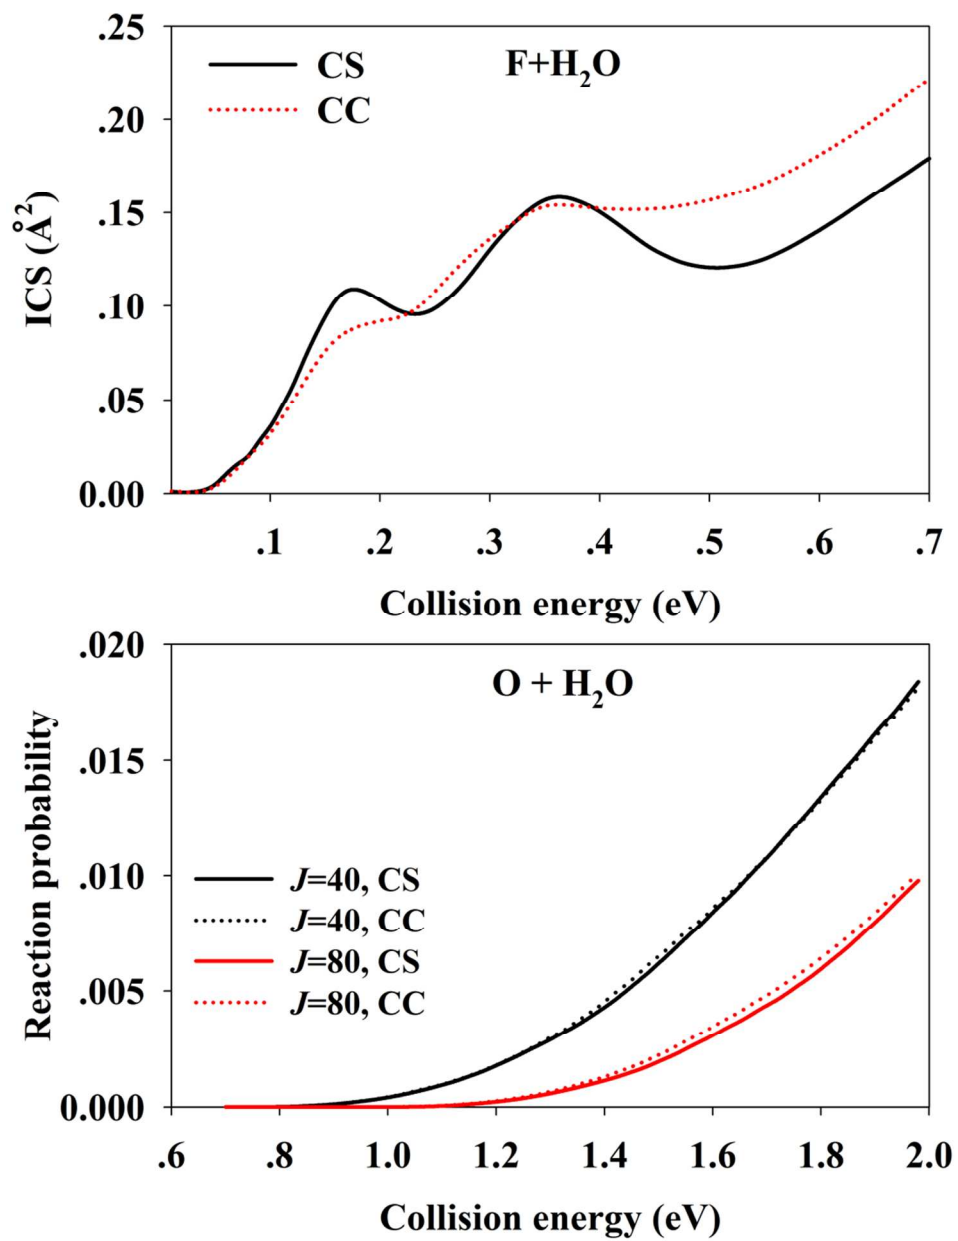

## References:

- (1) Goldfield, E. M.; Gray, S. K. *Adv. Chem. Phys.* **2007**, 136, 1.
- (2) Guo, H. *Int. Rev. Phys. Chem.* **2012**, 31, 1.
- (3) Lin, S. Y.; Guo, H. *J. Chem. Phys.* **2003**, 119, 11602.
- (4) Lin, S. Y.; Guo, H. *Phys. Rev. A* **2006**, 74, 022703.
- (5) Ma, J.; Lin, S. Y.; Guo, H.; Sun, Z.; Zhang, D. H.; Xie, D. *J. Chem. Phys.* **2010**, 133, 054302.
- (6) Chen, R.; Ma, G.; Guo, H. *J. Chem. Phys.* **2001**, 114, 4763.
- (7) Goldfield, E. M.; Gray, S. K. *J. Chem. Phys.* **2002**, 117, 1604.
- (8) Zare, R. N. *Angular Momentum*; Wiley: New York, 1988.
- (9) Zhang, J. Z. H. *Theory and Application of Quantum Molecular Dynamics*; World Scientific: Singapore, 1999.
- (10) Zhang, D. H.; Light, J. C. *J. Chem. Phys.* **1996**, 104, 4544.
- (11) Lin, S. Y.; Guo, H. *J. Chem. Phys.* **2002**, 117, 5183.
- (12) Yu, H.-G.; Muckerman, J. T. *J. Molec. Spectrosc.* **2002**, 214, 11.
- (13) Jiang, B.; Xie, D.; Guo, H. *J. Chem. Phys.* **2011**, 135, 084112.
- (14) Corey, G. C.; Tromp, J. W.; Lemoine, D. In *Numerical Grid Methods and Their Applications to Schroedinger's Equation*; Cerjan, C., Ed.; Kluwer: Dordrecht, 1993, p 1.
- (15) Colbert, D. T.; Miller, W. H. *J. Chem. Phys.* **1992**, 96, 1982.
- (16) Echave, J.; Clary, D. C. *Chem. Phys. Lett.* **1992**, 190, 225.
- (17) Mandelshtam, V. A.; Taylor, H. S. *J. Chem. Phys.* **1995**, 103, 2903.
- (18) Chen, R.; Guo, H. *J. Chem. Phys.* **1998**, 108, 6068.
- (19) Gray, S. K.; Balint-Kurti, G. G. *J. Chem. Phys.* **1998**, 108, 950.
- (20) Pack, R. T. *J. Chem. Phys.* **1974**, 60, 633.
- (21) McGuire, P.; Kouri, D. J. *J. Chem. Phys.* **1974**, 60, 2488.
- (22) Zhang, D. H.; Yang, M.; Lee, S.-Y. *J. Chem. Phys.* **2002**, 117, 10067.
- (23) Fu, B.; Zhang, D. H. *J. Chem. Phys.* **2013**, 138, 184308.
